# Supplementary material for: Theoretical treatment of complex coacervate core micelles: structure and pH-induced disassembly
Source: Royal Society of Chemistry journal article supplement (doi:10.1039/d3sm01047c), 2023-01-01
Supplement: d3sm01047c1.pdf [file d3sm01047c1.pdf]

# Electronic Supplementary Information for: Theoretical Treatment of Complex Coacervate Core Micelles: Structure and pH-Induced Disassembly

Gabriel Debais<sup>a,†</sup>, Leandro L. Missoni<sup>a,†</sup>, Yamila A. Perez Sirkin<sup>\*,a</sup>, and Mario  
Tagliazucchi<sup>\*,a\*</sup>

<sup>a</sup> *Universidad de Buenos Aires, Facultad de Ciencias Exactas y Naturales, Departamento de Química Inorgánica Analítica y Química Física y CONICET-Universidad de Buenos Aires, Facultad de Ciencias Exactas y Naturales, Instituto de Química de los Materiales, Ambiente y Energía (INQUIMAE). Pabellón 2, Ciudad Universitaria, C1428, Ciudad Autónoma de Buenos Aires, Argentina.*

E-mail: mario@qi.fcen.uba.ar, yperezsirkin@qi.fcen.uba.ar

## Extremization of the semi-grand canonical free energy functional

We find the extreme the Lagrangian functional given by the semi-grand canonical free energy of the system and the constraints enforced through the use of Lagrange multipliers (Eq. 20 in the main text) with respect to the following functions:  $\rho_i(r)$ ,  $P_i(\alpha_i, r)$  and  $f_j^k(r)$ . The extreme with respect to the density distribution of solvent results in the expression,

$$\rho_s(r) = \rho_s^{bulk} \exp[-\beta v_s (\pi(r) - \pi^{bulk})] \quad (\text{S1})$$

where  $\rho_s^{bulk}$  is the density of the solvent in the bulk.<sup>1</sup>

The extreme with respect to respect the density distribution of the mobile species  $i = \text{H}^+, \text{OH}^-, \text{K}^+, \text{Cl}^-$ , results in:

$$\rho_i(r) = \rho_i^{bulk} \exp\{-\beta q_i [\psi(r) - \psi^{bulk}] - \beta v_i [\pi(r) - \pi^{bulk}]\} \quad (\text{S2})$$

The bulk potential,  $\psi^{bulk}$ , is set to zero hereafter. For the probability distribution function of molecular conformations  $P_i(\alpha_i, r)$  the final expression is:

$$P_{copol}(\alpha_{copol}, r) = Q_{copol}(r)^{-1} \exp\left[-\sum_{k=A,N} \int n_{copol,k}(r', \alpha_{copol}, r) v_p \beta \pi(r') dr' - \int n_{copol,A}(r', \alpha_{copol}, r) \left(\ln(f_c^A(r')) + \beta \psi(r') q_{A-}\right) dr'\right] \quad (\text{S3})$$

$$P_{guest}(\alpha_{guest}, r) = Q_{guest}(r)^{-1} \exp\left[-\int n_{guest,B}(r', \alpha_{guest}, r) \left(\ln(f_c^B(r')) + \beta \psi(r') q_{B-} + v_p \beta \pi(r')\right) dr'\right] \quad (\text{S4})$$

where  $Q_i(r) = \exp(1 + \xi_i(r)/[G(r)\rho_i(r)])$ .

The minimization with respect to the fraction of segments in different states,  $f_j^A$  for copolymer A segments (with  $j = c, uc, A-B, A-ion$ ) and  $f_j^B$  for guest B segments (with  $j = c, uc, A-B, B-ion$ ) results in the expressions of the acid-base equilibrium and the copolymer/guest, salt-ion/copolymer and salt-ion/guest ion-pairing equilibria.

The acid-base equilibrium of the A groups in the copolymer (Eq. 2 in the main text) is given by:

$$K_A^\theta = \frac{f_c^A(r)\rho_{H^+}(r)}{f_{uc}^A(r)\rho_s(r)} \quad (S5)$$

where  $K_A^\theta = \exp(-\beta\Delta G_A^\theta) = \exp[-\beta(\mu_{H^+}^\theta + \mu_c^{\theta,A} - \mu_{uc}^{\theta,A})]$  is the thermodynamic equilibrium constant of the acid-base reaction.

In analogy, the acid-base equilibrium of the base groups of the guest molecule (8) is,

$$K_B^\theta = \frac{f_c^B(r)\rho_{OH^-}(r)}{f_{uc}^B(r)\rho_s(r)} \quad (S6)$$

where  $K_B^\theta = \exp(-\beta\Delta G_B^\theta) = \exp[-\beta(\mu_{OH^-}^\theta + \mu_c^{\theta,B} - \mu_{uc}^{\theta,B})]$ .

The thermodynamic constants  $K_A^\theta$  and  $K_B^\theta$  are related to the equilibrium constants in molar reference states by dividing them by a factor  $c_0 N_A v_s / (10^{24} \text{ nm}^3 / \text{dm}^3)$ , where  $c_0$  is the standard concentration (1 M) and  $N_A$  is Avogadro's number.

The equilibrium reaction for ion pairing between copolymer A segments and salt cations (Eq. 4 in the main text) is given by:

$$K_{A\text{-ion}}^\theta = \frac{f_{A\text{-ion}}^A(r)(\rho_s(r)v_s)^{v_{K^+}/v_s}}{f_c^A(r)\rho_{K^+}(r)v_s} \quad (S7)$$

where  $K_{A\text{-ion}}^\theta = \exp[\beta(\mu_{K^+}^\theta + \mu_c^{\theta,A} - \mu_{A\text{-ion}}^{\theta,A})]$ . The equation for ion pairing between anions and B segments in the guest molecule (Eq. 5 in the main text) is:

$$K_{B\text{-ion}}^\theta = \frac{f_{B\text{-ion}}^B(r)(\rho_s(r)v_s)^{v_{Cl^-}/v_s}}{f_c^B(r)\rho_{Cl^-}(r)v_s} \quad (S8)$$

where  $K_{B\text{-ion}}^\theta = \exp[\beta(\mu_{Cl^-}^\theta + \mu_c^{\theta,B} - \mu_{B\text{-ion}}^{\theta,B})]$ .

In the dilute limit ( $\rho_s^{bulk} v_s \rightarrow 1$ ), the thermodynamic constants  $K_{A\text{-ion}}^\theta$  and  $K_{B\text{-ion}}^\theta$  can be transformed to association constants using molar concentrations by multiplication by  $c_0 N_A v_s / (10^{24} \text{ nm}^3 / \text{dm}^3)$ .

The association equilibrium between copolymer and guest segments (Eq. 1 in the main text) is

$$K_{\text{A-B}}^\theta v_{\text{AB}} = \frac{f_{\text{A-B}}^{\text{A}}(r)}{f_c^{\text{A}}(r)f_c^{\text{B}}(r)\langle n_{\text{B}}(r) \rangle} = \frac{f_{\text{A-B}}^{\text{B}}(r)}{f_c^{\text{A}}(r)f_c^{\text{B}}(r)\langle n_{\text{A}}(r) \rangle} \quad (\text{S9})$$

where  $K_{\text{A-B}}^\theta = \exp \left[ \beta(\mu_{\text{A-B}}^{\theta,\text{A}} + \mu_{\text{A-B}}^{\theta,\text{B}} - \mu_c^{\theta,\text{A}} - \mu_c^{\theta,\text{B}}) \right]$

Once again, it is possible to obtain the association constant in the molar reference state,  $K_{\text{A-B}}$ , as  $K_{\text{A-B}} = K_{\text{A-B}}^\theta v_{\text{AB}} c_0 N_{\text{A}} / (10^{24} \text{ nm}^3 / \text{dm}^3)$ .

The functional extreme respect to the electrostatic potential,  $\psi(r)$ , results in

$$\nabla \cdot (\epsilon \nabla \psi(r)) = -\langle \rho_q(r) \rangle \quad (\text{S10})$$

Eq. S10 is a mean-field Poisson equation for electrostatics, where the electrostatic potential and the number density of charges are replaced by their ensemble averages. The boundary conditions for this equation are  $\psi(r \rightarrow \infty) = 0$  (bulk) and symmetric conditions (null derivative) at  $r = 0$ :

$$\left. \frac{\partial \psi(r)}{\partial r} \right|_{r=0} = 0 \quad (\text{S11})$$

Additional information on the derivation and solving of the molecular theory (MOLT) can be found in our previous publication of amphiphile assemblies<sup>2-4</sup> and polyelectrolyte complexes.<sup>5,6</sup>

## Discretization and numerical solving

The set of Eqs. S1-S10 is solved by discretizing these equations and the packing constraint (Eq. 16 in the main text) in a grid along the  $r$ -direction, using layers of thickness  $\delta = 0.2$  nm. The set of resulting non-linear equations is solved numerically using a Jacobian-free Newton method.<sup>7</sup>

## Calculation of the radii of the core and the micelle from the volume-fraction profiles of the segments

We use the volume-fraction profiles of each type of segment  $\langle\phi_A(r)\rangle$ ,  $\langle\phi_B(r)\rangle$  and  $\langle\phi_N(r)\rangle$  to calculate the core and total radius of the C3Ms from MOLT. In the case of core radius  $R_{core}$ , we first sum the volume fractions of the charged segments to obtain the volume fraction profile of the core  $\langle\phi_{core}(r)\rangle = \langle\phi_A(r)\rangle + \langle\phi_B(r)\rangle$ . We then obtain  $R_{core}$  from the equimolar dividing surface using a definition of that is typically used in molecular dynamic simulations to determine the radii of droplets.<sup>8</sup> More specifically,  $R_{core}$  is given by:

$$R_{core} = \left[ \frac{1}{\langle\phi_{core}\rangle_{r < R_{core}} - \langle\phi_{core}\rangle_{r > R_{core}}} \int_0^{+\infty} r^3 \frac{d\langle\phi_{core}(r)\rangle}{dr} dr \right]^{1/3} \quad (\text{S12})$$

where we used  $\langle\phi_{core}\rangle_{r > R_{core}} = \max \langle\phi_{core}(r)\rangle$  and  $\langle\phi_{core}\rangle_{r < R_{core}} - \langle\phi_{core}\rangle_{r > R_{core}} = -\langle\phi_{core}\rangle_{r > R_{core}}$ .

The derivative and integral in Eq. S12 were evaluated numerically in the whole calculation box.

The total radius of the micelles  $R_H$  was obtained from the distribution of the neutral monomers  $\langle\phi_N(r)\rangle$ . Once again, we used the equimolar surface at  $R_H$ , defined by Equation S12.

## Effect of the length of the guest molecule on the structure of C3Ms

Figure S1 shows the effect of varying the length of the guest molecule ( $z$ ) on the radii of the micelle and the core, keeping constant the length of the copolymer blocks. The ratio of copolymer to guest molecules was varied in order to ensure a 1:1 stoichiometry between A and B blocks. The small scaling exponents obtained by fitting the experimental results (0.03 and 0.05, see Figure) are consistent with the nearly-zero scaling exponents experimentally found by Marras et al. for polyglutamic and DNA guest molecules combined with different

PEG-poly(lysine) diblock copolymers.<sup>9</sup>

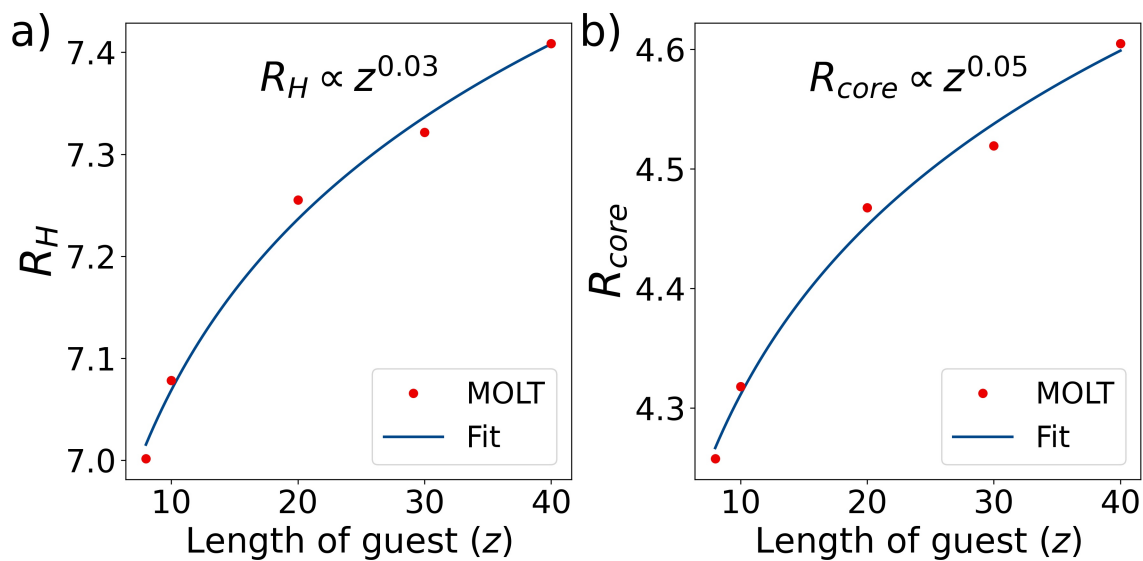

Figure S1: Effect of the length of the guest molecule B (for a fixed length of the charged block of the copolymer, A, and a 1:1 A:B fixed global stoichiometry on the radius of the micelle (left panel) and the core (right panel). Calculation parameters: length of the acidic copolymer block  $x = 20$  and length of the neutral copolymer block  $y = 20$ .

## References

- (1) Nap, R.; Gong, P.; Szleifer, I. Weak polyelectrolytes tethered to surfaces: effect of geometry, acid–base equilibrium and electrical permittivity. *J. Polym. Sci. B: Polym. Phys.* **2006**, *44*, 2638–2662.
- (2) Zaldivar, G.; Samad, M.; Conda-Sheridan, M.; Tagliazucchi, M. Self-assembly of model short triblock amphiphiles in dilute solution. *Soft Matter* **2018**, *14*, 3171–3181.
- (3) Zaldivar, G.; Vemulapalli, S.; Udumula, V.; Conda-Sheridan, M.; Tagliazucchi, M. Self-assembled nanostructures of peptide amphiphiles: charge regulation by size regulation. *The Journal of Physical Chemistry C* **2019**, *123*, 17606–17615.
- (4) Zaldivar, G.; Conda-Sheridan, M.; Tagliazucchi, M. Scission energies of surfactant worm-like micelles loaded with nonpolar additives. *J. Colloid Interface Sci.* **2021**, *604*, 757–766.
- (5) Debais, G.; Tagliazucchi, M. Two Sides of the Same Coin: A Unified Theoretical Treatment of Polyelectrolyte Complexation in Solution and Layer-by-Layer Films. *Macromolecules* **2022**, *55*, 5263–5275.
- (6) Gabriel, D.; Tagliazucchi, M. Microphase separation and aggregate selfassembly in brushes of oppositely charged polyelectrolytes triggered by ion pairing. *J. Chem. Phys.* **2020**, *153*, 144903.
- (7) Hindmarsh, A. C.; Brown, P. N.; Grant, K. E.; Lee, S. L.; Serban, R.; Shumaker, D. E.; Woodward, C. S. SUNDIALS: Suite of nonlinear and differential/algebraic equation solvers. *ACM Trans. Math. Softw.* **2005**, *31*, 363–396.
- (8) Thompson, S.; Gubbins, K.; Walton, J.; Chantry, R.; Rowlinson, J. A molecular dynamics study of liquid drops. *J. Chem. Phys.* **1984**, *81*, 530–542.
- (9) Marras, A. E.; Campagna, T. R.; Vieregge, J. R.; Tirrell, M. V. Physical property scaling relationships for polyelectrolyte complex micelles. *Macromolecules* **2021**, *54*, 6585–6594.
